# Supplementary material
Source: publisher site journal article supplement (https://www.dovepress.com/article/381466)
Supplement: Supplementary file 1 [file get_supplementary_file.php]

**Supplementary Table 1.** The detailed information of assembly genomes of 122 GBS Chinese isolates downloaded from public database for comparison of genetic features.

| **Strain** | **BioSample** | **Assembly** | **Location** | **Host** | **Isolation source** | **Isolation type** | **Year** |
| --- | --- | --- | --- | --- | --- | --- | --- |
| YM001 | SAMN02996604 | GCA_001190825.1 | China: Guangxi | tiapia | brain | clinical | 2011 |
| ZQ0910 | SAMN14331836 | GCA_011383065.1 | China:Guangdong | Unknown | not collected | Unknown | 2010 |
| C001 | SAMN02850626 | GCA_002214425.1 | China: Guangxi | Cow | Cow's milk | clinical | 2013 |
| BJCH_SA2 | SAMN10721831 | GCA_004349445.1 | China:Beijing | Homo sapiens | CSF | clinical | 2016 |
| BJCH_SA1 | SAMN10721813 | GCA_004349485.1 | China:Beijing | Homo sapiens | CSF | clinical | 2016 |
| WC1535 | SAMN05370985 | GCA_001729925.2 | China: Hainan | tilapia | Unknown | environmental/other | 2015 |
| H002 | SAMN02991570 | GCA_001190885.1 | China: Guangxi | Homo sapiens | vagina | clinical | 2011 |
| BJCH_SA5 | SAMN10721846 | GCA_004349535.1 | China: Beijing | Homo sapiens | CSF | clinical | 2016 |
| HN016 | SAMN02992126 | GCA_001190805.1 | China: Guangxi | tiapia | brain | clinical | 2011 |
| GX064 | SAMN02991566 | GCA_001190845.1 | China: Guangxi | tiapia | brain | clinical | 2011 |
| Hn1404 | SAMN05188706 | GCA_002246945.1 | China: Guangdong | Hypophthalmichthys nobilis | Unknown | environmental/other | 2014 |
| BJ01 | SAMN15580042 | GCA_013786965.1 | China: Beijing | Neonates | blood | clinical | 2017 |
| FWL1402 | SAMN05187216 | GCA_001683515.1 | China: Huizhou | Hoplobatrachus rugulosus | Unknown | environmental/other | 2014 |
| BJCH_SA4 | SAMN10721843 | GCA_004349495.1 | China: Beijing | Homo sapiens | CSF | clinical | 2016 |
| BJCH_SA3 | SAMN10721832 | GCA_004349525.1 | China: Beijing | Homo sapiens | CSF | clinical | 2016 |
| DML120817 | SAMN06621589 | GCA_002104835.1 | China: Sichuan | Schizothorax prenanti | Unknown | environmental/other | 2012 |
| SG2R1 | SAMN10654153 | GCA_003992515.1 | China: Shenzhen | Unknown | Unknown | Unknown | 2018 |
| P65 | SAMN21906715 | GCA_020297195.1 | China: Taiwan | Homo sapiens | vaginal-rectal swabs | clinical | 2016 |
| N96 | SAMN21906713 | GCA_020297185.1 | China: Taiwan | Homo sapiens | cerebrospinal fluid | clinical | 2006 |
| A28 | SAMN21906714 | GCA_020297245.1 | China: Taiwan | Homo sapiens | blood | clinical | 2011 |
| SG2 | SAMN10654151 | GCA_003992555.1 | China: Shenzhen | Unknown | Unknown | Unknown | 2018 |
| GBS-M002 | SAMN04376007 | GCA_001932715.1 | China: Taiwan | Homo sapiens | cervix | clinical | 2014 |
| 230 | SAMN13340661 | GCA_009771235.1 | China: Taiwan | Homo sapiens | blood | clinical | 2017 |
| PZD30 | SAMN20953734 | GCA_019794015.1 | China | cow | Unknown | environmental/other | 2018 |
| PZD29 | SAMN20953733 | GCA_019794035.1 | China | cow | Unknown | environmental/other | 2018 |
| DL03 | SAMN20953725 | GCA_019794135.1 | China | Homo sapiens | Unknown | clinical | 2017 |
| N48 | SAMN21906712 | GCA_020297305.1 | China:Taiwan | Homo sapiens | cerebrospinal fluid | clinical | 2012 |
| Sag158 | SAMN06445344 | GCA_002025005.1 | China: Shanghai | Homo sapiens | Unknown | clinical | 2014 |
| 192 | SAMN13340657 | GCA_009771325.1 | China:Taiwan | Homo sapiens | blood | clinical | 2017 |
| 189 | SAMN13340656 | GCA_009771345.1 | China:Taiwan | Homo sapiens | blood | clinical | 2017 |
| 250 | SAMN13340664 | GCA_009771945.1 | China:Taiwan | Homo sapiens | blood | clinical | 2017 |
| YZ1605 | SAMN08374174 | GCA_009930895.1 | China | cow | milk | clinical | 2016 |
| G6-23 | SAMN20953727 | GCA_019793945.1 | China | cow | Unknown | environmental/other | 2020 |
| G1-9 | SAMN20953726 | GCA_019793995.1 | China | cow | Unknown | environmental/other | 2020 |
| PZD12 | SAMN20953731 | GCA_019794085.1 | China | cow | Unknown | environmental/other | 2018 |
| G9 | SAMN20953728 | GCA_019794635.1 | China | cow | Unknown | environmental/other | 2018 |
| HFJ96 | SAMN20953777 | GCA_019794875.1 | China | cow | Unknown | environmental/other | 2019 |
| P103 | SAMN21906716 | GCA_020297345.1 | China:Taiwan | Homo sapiens | swabs | clinical | 2016 |
| M19 | SAMN03292190 | GCA_001708205.1 | China: Ningxia | cow | milk | environmental/other | 2010 |
| GZ13 | SAMN05213958 | GCA_001880745.1 | China | Homo sapiens | blood | clinical | 2013 |
| sz_20 | SAMN08287478 | GCA_004120405.1 | China: SuZhou | Homo sapiens | urine | clinical | 2016 |
| 207 | SAMN13340658 | GCA_009771295.1 | China:Taiwan | Homo sapiens | blood | clinical | 2017 |
| M134 | SAMN13340726 | GCA_009771375.1 | China:Taiwan | Homo sapiens | cervix | clinical | 2017 |
| M72 | SAMN13340673 | GCA_009771785.1 | China:Taiwan | Homo sapiens | cervix | clinical | 2014 |
| M48 | SAMN13340671 | GCA_009771805.1 | China:Taiwan | Homo sapiens | cervix | clinical | 2014 |
| M29 | SAMN13340670 | GCA_009771825.1 | China:Taiwan | Homo sapiens | cervix | clinical | 2014 |
| M111 | SAMN13340666 | GCA_009771895.1 | China:Taiwan | Homo sapiens | cervix | clinical | 2014 |
| NJ1606 | SAMN08374240 | GCA_009930915.1 | China | cow | milk | environmental/other | 2016 |
| N1 | SAMN21187257 | GCA_020179695.1 | China: Shanghai | Homo sapiens | urine | clinical | 2016 |
| N3 | SAMN21193305 | GCA_020179715.1 | China: Shanghai | Homo sapiens | sputum | clinical | 2017 |
| ZDN66 | SAMN21877941 | GCA_020786485.1 | China: Shanghai | Homo sapiens | urine | clinical | 2018 |
| ZDN51 | SAMN21877936 | GCA_020786535.1 | China: Shanghai | Homo sapiens | urine | clinical | 2018 |
| ZDN34 | SAMN21877935 | GCA_020786565.1 | China: Shanghai | Homo sapiens | urine | clinical | 2017 |
| 189 | SAMN21877929 | GCA_020786655.1 | China: Shanghai | Homo sapiens | Vaginal fluid | clinical | 2020 |
| ZDN52 | SAMN21877937 | GCA_020786775.1 | China: Shanghai | Homo sapiens | urine | clinical | 2018 |
| 179 | SAMN21877928 | GCA_020859495.1 | China: Shanghai | Homo sapiens | Vaginal fluid | clinical | 2020 |
| 14-66 | SAMN07285927 | GCA_002266935.1 | China | Oreochromis niloticus | fish farm | environmental/other | 2013 |
| 14-119 | SAMN07285929 | GCA_002266915.1 | China | Oreochromis niloticus | fish farm | environmental/other | 2013 |
| TFJ0901 | SAMN09379579 | GCA_003939065.1 | China: Fujian | Oreochromis niloticus | Unknown | environmental/other | 2009 |
| HFJ14 | SAMN20953729 | GCA_019794075.1 | China | cow | Unknown | environmental/other | 2019 |
| B509 | SAMN07178061 | GCA_003287995.1 | China: Shenzhen | Homo sapiens | vagina swab | clinical | 2016 |
| B111 | SAMN07178058 | GCA_003288075.1 | China: Shenzhen | Homo sapiens | blood | clinical | 2016 |
| 214 | SAMN13340659 | GCA_009771285.1 | China:Taiwan | Homo sapiens | blood | clinical | 2017 |
| GBS186 | SAMN14819553 | GCA_020980285.1 | China | cow | not collected | clinical | not collected |
| GBS184 | SAMN14819551 | GCA_020980305.1 | China | cow | not collected | clinical | not collected |
| GBS182 | SAMN14819531 | GCA_020980675.1 | China | cow | not collected | clinical | not collected |
| 236 | SAMN13340662 | GCA_009771215.1 | China:Taiwan | Homo sapiens | blood | clinical | 2017 |
| PZD2 | SAMN20953732 | GCA_019794045.1 | China | cow | Unknown | environmental/other | 2018 |
| PZD1 | SAMN20953730 | GCA_019794115.1 | China | cow | Unknown | environmental/other | 2018 |
| Sag37 | SAMN06329441 | GCA_002025025.1 | China: Shanghai | Homo sapiens | Unknown | clinical | 2014 |
| sz_11 | SAMN08287476 | GCA_004120395.1 | China: SuZhou | Homo sapiens | urine | clinical | 2016 |
| M94 | SAMN13340674 | GCA_009771775.1 | China:Taiwan: | Homo sapiens | cervix | clinical | 2014 |
| M103 | SAMN13340665 | GCA_009771925.1 | China:Taiwan | Homo sapiens | cervix | clinical | 2014 |
| bd_2 | SAMN21877932 | GCA_020786575.1 | China: Shanghai | Homo sapiens | Vaginal fluid | clinical | 2020 |
| Sag153 | SAMN10907844 | GCA_012222485.1 | China: Shanghai | Homo sapiens | Vaginal swab | clinical | 2017 |
| M50 | SAMN13340672 | GCA_009771795.1 | China:Taiwan | Homo sapiens | cervix | clinical | 2014 |
| N2 | SAMN21193211 | GCA_020179655.1 | China: Shanghai | Homo sapiens | intraocular contents | clinical | 2017 |
| 115 | SAMN13340655 | GCA_009771385.1 | China:Taiwan | Homo sapiens | blood | clinical | 2017 |
| H008P0 | SAMN03968475 | GCA_003186745.1 | China: Guangxi | Homo sapiens | Vaginal swab | clinical | 2014 |
| CH-2 | SAMN05213949 | GCA_001880665.1 | China | Homo sapiens | blood | clinical | 2013 |
| GZ08 | SAMN05213955 | GCA_001880725.1 | China | Homo sapiens | blood | clinical | 2013 |
| B508 | SAMN07178060 | GCA_003288015.1 | China: Shenzhen | Homo sapiens | vagina swab | clinical | 2016 |
| M171 | SAMN13340668 | GCA_009771865.1 | China:Taiwan | Homo sapiens | cervix | clinical | 2017 |
| B7 | SAMN21194383 | GCA_020179735.1 | China: Shanghai | Homo sapiens | blood | clinical | 2019 |
| B5 | SAMN21194382 | GCA_020179785.1 | China: Shanghai | Homo sapiens | blood | clinical | 2016 |
| 171 | SAMN21877927 | GCA_020786615.1 | China: Shanghai | Homo sapiens | Vaginal fluid | clinical | 2021 |
| 149 | SAMN21877925 | GCA_020786685.1 | China: Shanghai | Homo sapiens | Vaginal fluid | clinical | 2020 |
| 167 | SAMN21877926 | GCA_020786715.1 | China: Shanghai | Homo sapiens | Vaginal fluid | clinical | 2020 |
| HZAUSC001 | SAMN03955805 | GCA_001675305.1 | China: Guangdong | Oreochromis niloticus | intestinal tract | clinical | 2014 |
| SH016 | SAMN10492056 | GCA_003931905.1 | China: Shanghai | Homo sapiens | sputum | clinical | 2013 |
| SH009 | SAMN10492088 | GCA_003931955.1 | China: Shanghai | Homo sapiens | sputum | clinical | 2012 |
| B507 | SAMN07178059 | GCA_003288055.1 | China: Shenzhen | Homo sapiens | vagina swab | clinical | 2016 |
| 32790-3A | SAMN09229090 | GCA_006716245.1 | China | Homo sapiens | blood | clinical | 2016 |
| 4104 | SAMN11080985 | GCA_004353995.1 | China: Shanghai | Homo sapiens | urine | clinical | 2018 |
| ZDN62 | SAMN21877938 | GCA_020786675.1 | China: Shanghai | Homo sapiens | urine | clinical | 2018 |
| GZ05 | SAMN05213953 | GCA_001880505.1 | China | Homo sapiens | blood | clinical | 2013 |
| CH-1 | SAMN05213948 | GCA_001880625.1 | China | Homo sapiens | cerebrospinal fluid | clinical | 2013 |
| GZ14 | SAMN05213959 | GCA_001880605.1 | China | Homo sapiens | cerebrospinal fluid | clinical | 2013 |
| GZ01 | SAMN05213951 | GCA_001880685.1 | China | Homo sapiens | blood | clinical | 2013 |
| Sag27 | SAMN09789228 | GCA_003403115.1 | China: Shanghai | Homo sapiens | perianal region | clinical | 2018 |
| ZDN63 | SAMN21877939 | GCA_020786455.1 | China: Shanghai | Homo sapiens | urine | clinical | 2018 |
| ZDN65 | SAMN21877940 | GCA_020786475.1 | China: Shanghai | Homo sapiens | urine | clinical | 2018 |
| 228 | SAMN13340660 | GCA_009771255.1 | China:Taiwan | Homo sapiens | blood | clinical | 2017 |
| M115 | SAMN13340667 | GCA_009771885.1 | China:Taiwan | Homo sapiens | cervix | clinical | 2014 |
| 247 | SAMN13340663 | GCA_009771985.1 | China:Taiwan | Homo sapiens | blood | clinical | 2017 |
| GZ06 | SAMN05213954 | GCA_001880515.1 | China | Homo sapiens | blood | clinical | 2013 |
| GZ11 | SAMN05213956 | GCA_001880525.1 | China | Homo sapiens | blood | clinical | 2013 |
| GZ02 | SAMN05213952 | GCA_001880535.1 | China | Homo sapiens | blood | clinical | 2013 |
| M219 | SAMN13340669 | GCA_009771845.1 | China: Taiwan | Homo sapiens | cervix | clinical | 2017 |
| F11 | SAMN21877933 | GCA_020859635.1 | China: Shanghai | Homo sapiens | blood | clinical | 2020 |
| B2 | SAMN21877930 | GCA_020786555.1 | China: Shanghai | Homo sapiens | Vaginal fluid | clinical | 2017 |
| B3 | SAMN21877931 | GCA_020786725.1 | China: Shanghai | Homo sapiens | Vaginal fluid | clinical | 2017 |
| sz_17 | SAMN08287477 | GCA_004120375.1 | China:SuZhou | Homo sapiens | urine | clinical | 2016 |
| CS01 | SAMN05213950 | GCA_001880675.1 | China | Homo sapiens | blood | clinical | 2013 |
| sz_24 | SAMN08287479 | GCA_004120385.1 | China: SuZhou | Homo sapiens | urine | clinical | 2016 |
| sz_8 | SAMN08287475 | GCA_004120435.1 | China: SuZhou | Homo sapiens | urine | clinical | 2016 |
| B1 | SAMN21194162 | GCA_020179765.1 | China: Shanghai | Homo sapiens | blood | clinical | 2012 |
| F11-M | SAMN21877934 | GCA_020786755.1 | China: Shanghai | Homo sapiens | Vaginal fluid | clinical | 2020 |
| GZ12 | SAMN05213957 | GCA_001880585.1 | China | Homo sapiens | blood | clinical | 2013 |
| GZ19 | SAMN05213960 | GCA_001880765.1 | China | Homo sapiens | blood | clinical | 2013 |
| B105 | SAMN07178057 | GCA_003288035.1 | China: Shenzhen | Homo sapiens | blood | clinical | 2016 |
| GZ20 | SAMN05213961 | GCA_001880615.1 | China | Homo sapiens | cerebrospinal fluid | clinical | 2013 |
